# Supplementary material
Source: PubMed Central journal article supplement (PMC1502429)

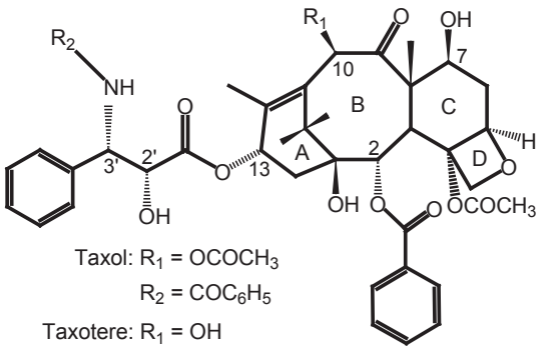

Taxol:  $R_1 = \text{OCOCH}_3$

$R_2 = \text{COC}_6\text{H}_5$

Taxotere:  $R_1 = \text{OH}$

$R_2 = \text{COOC}(\text{CH}_3)_3$

Supplement: pnas_0603704103_1.pdf [file pnas_0603704103_1.pdf]

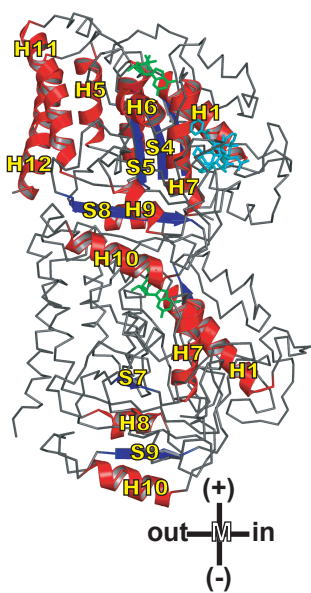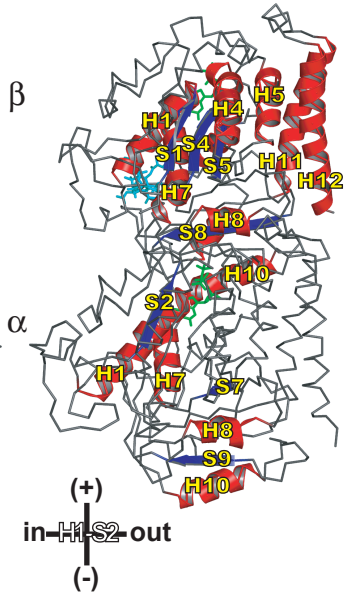

Supplement: pnas_0603704103_2.pdf [file pnas_0603704103_2.pdf]

A

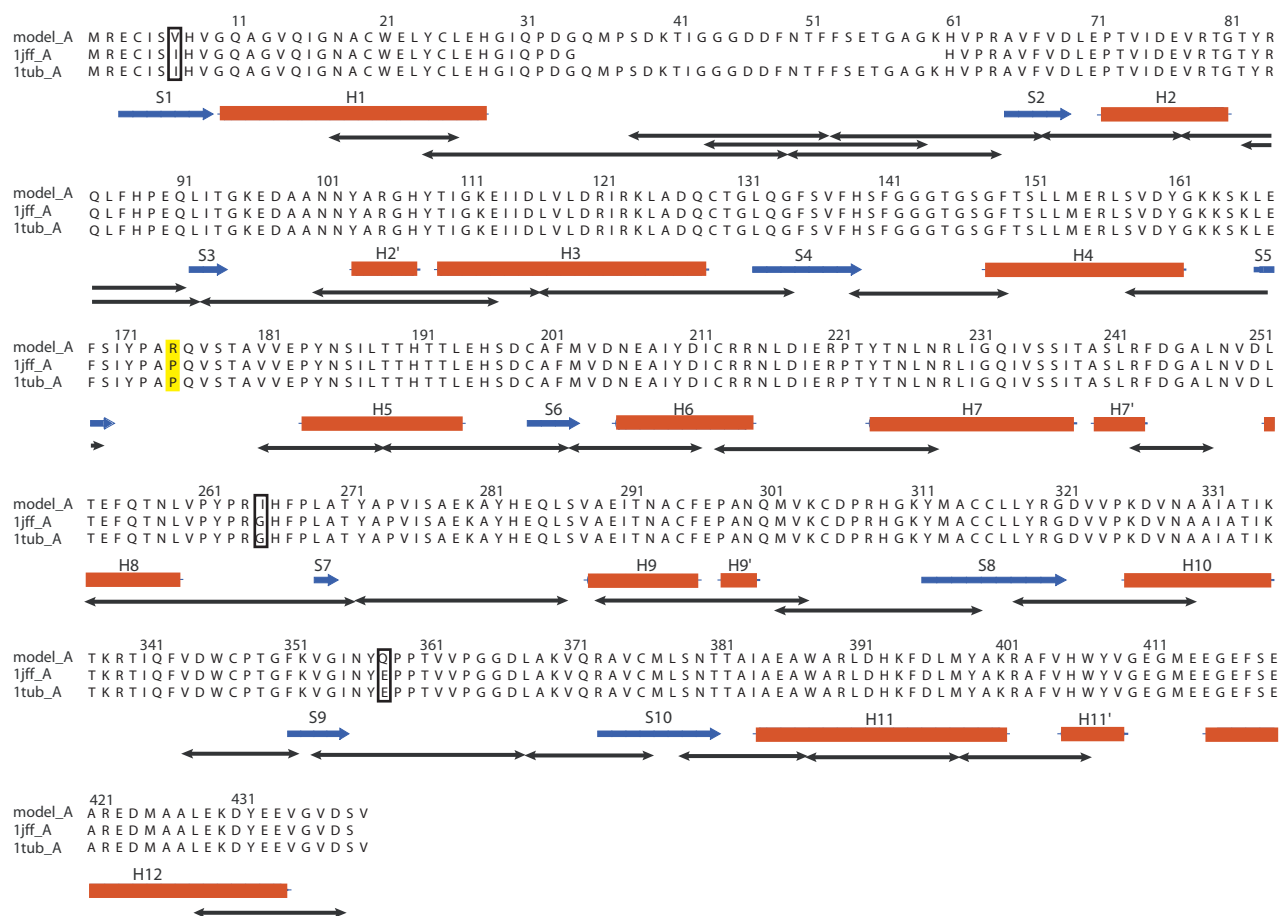

B

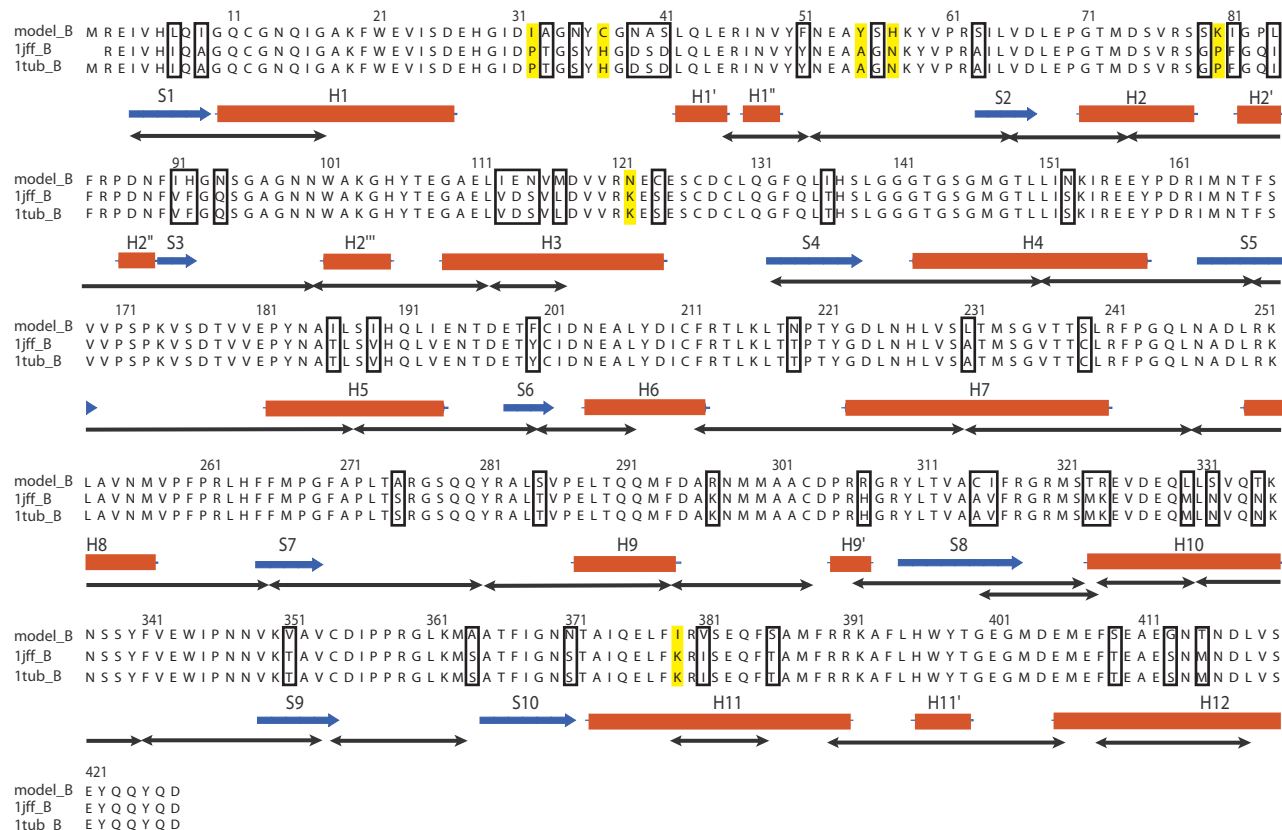

Supplement: pnas_0603704103_3.pdf [file pnas_0603704103_3.pdf]

A

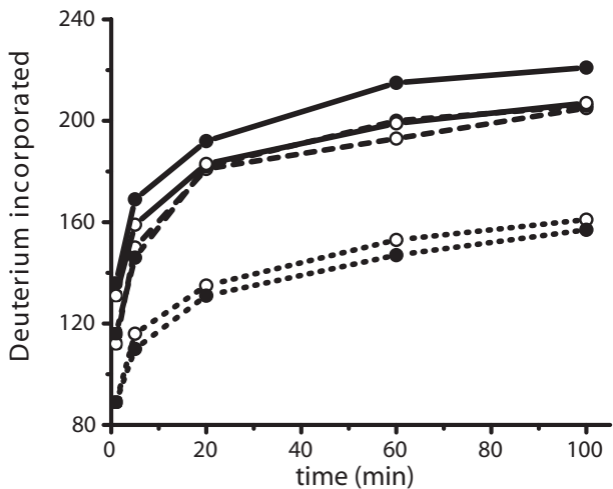

B

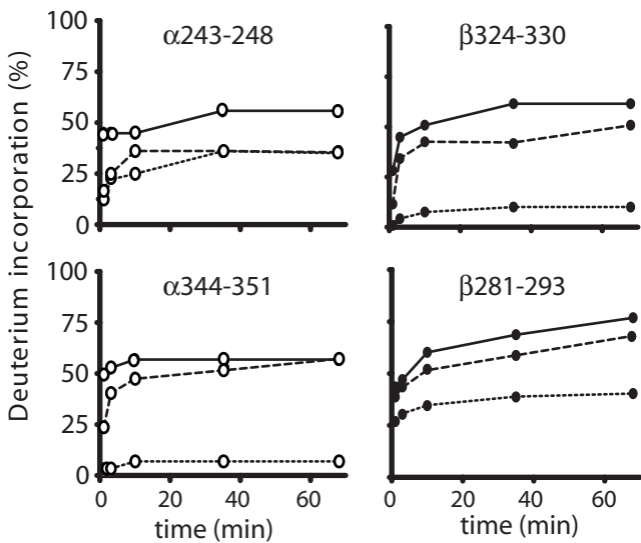

Supplement: pnas_0603704103_4.pdf [file pnas_0603704103_4.pdf]

A

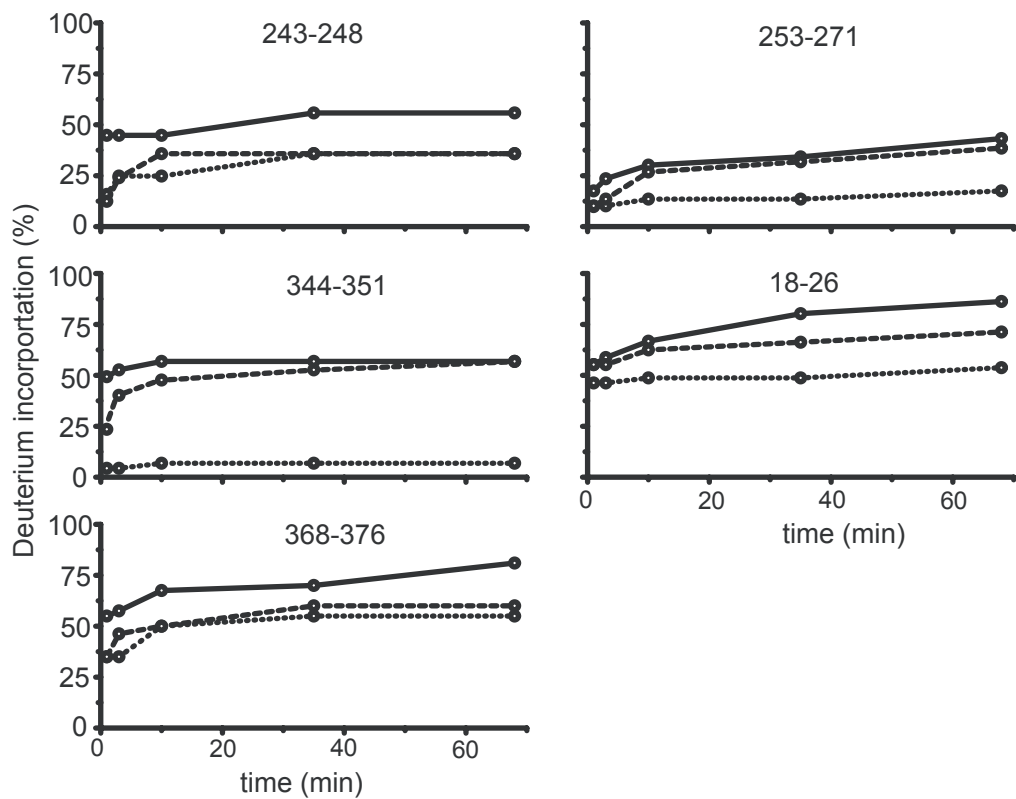

B

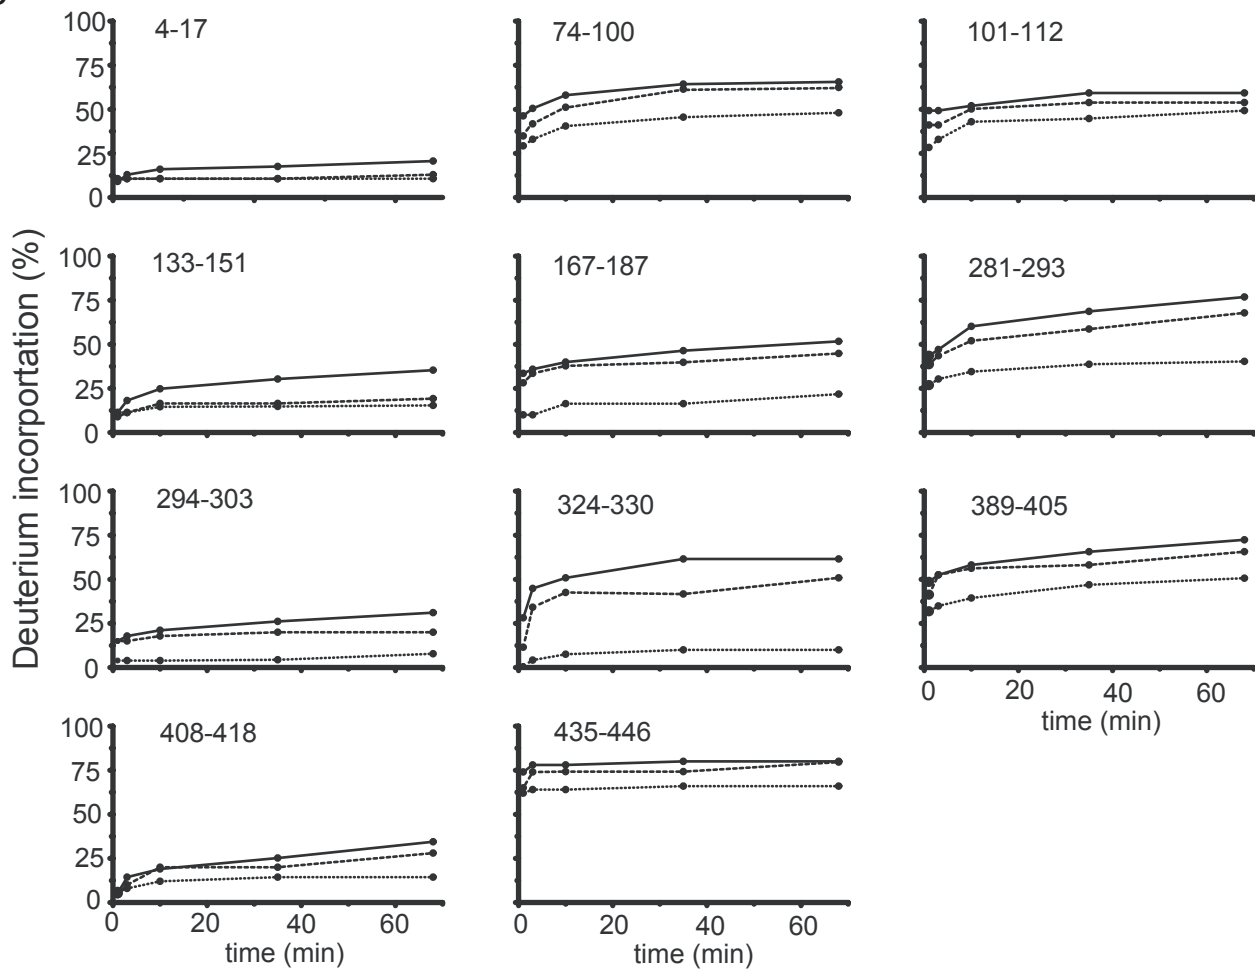

Supplement: pnas_0603704103_5.pdf [file pnas_0603704103_5.pdf]
